# Supplementary material
Source: PubMed Central journal article supplement (PMC3584000)
Supplement: a673ab84821a424a5f2fec2e78f354e8_genetics.112.148635-1.pdf [file a673ab84821a424a5f2fec2e78f354e8_genetics.112.148635-1.pdf]

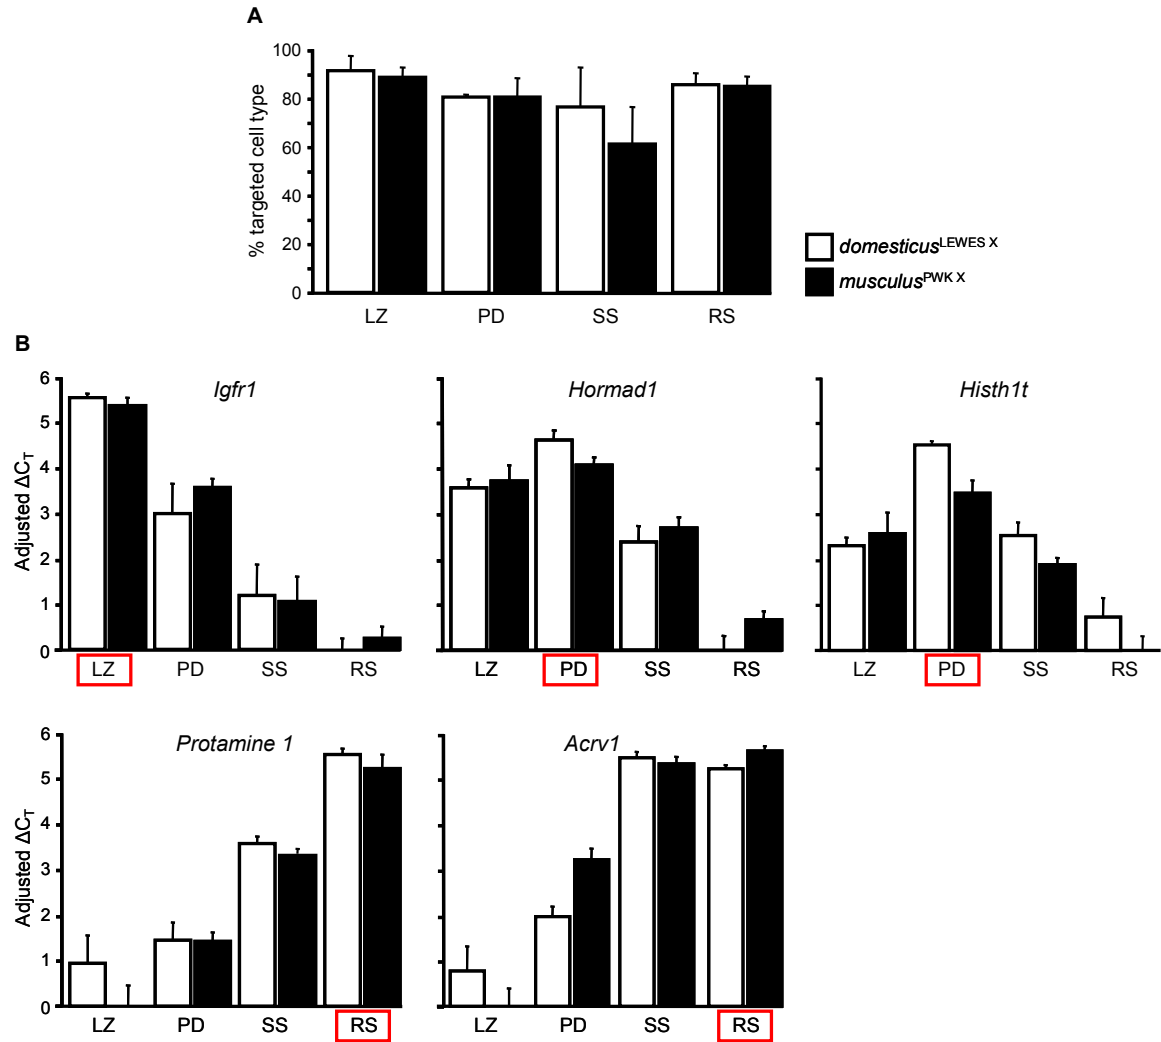

**Figure S1** Validations of germ cell population purity. (A) Percentage of targeted cell types based on Giemsa staining for spermatogonia/early prophase I (LZ), pachytene/diplotene (PD), secondary spermatocyte (SS), and round spermatid (RS) populations from reciprocal F<sub>1</sub> males (white bars, *domesticus*<sup>LEWES X</sup> X chromosome; black bars, *musculus*<sup>PWK X</sup> X chromosome). Data are presented as genotype means + 1 SE. (B) Autosomal genes that are expressed in different germ cell types are enriched in the correct germ cell populations from reciprocal F<sub>1</sub> males. The cell population in which each gene should be most highly expressed is indicated with a red box. All genes were enriched in the expected cell populations with the exception of *Acrv1*, which was equally enriched in the SS and RS populations. Expression was normalized relative to *Ubc* ( $\Delta C_T$ ) and adjusted to produce positive values by setting the lowest expression level to zero. Data are presented as genotype means + 1 SE.

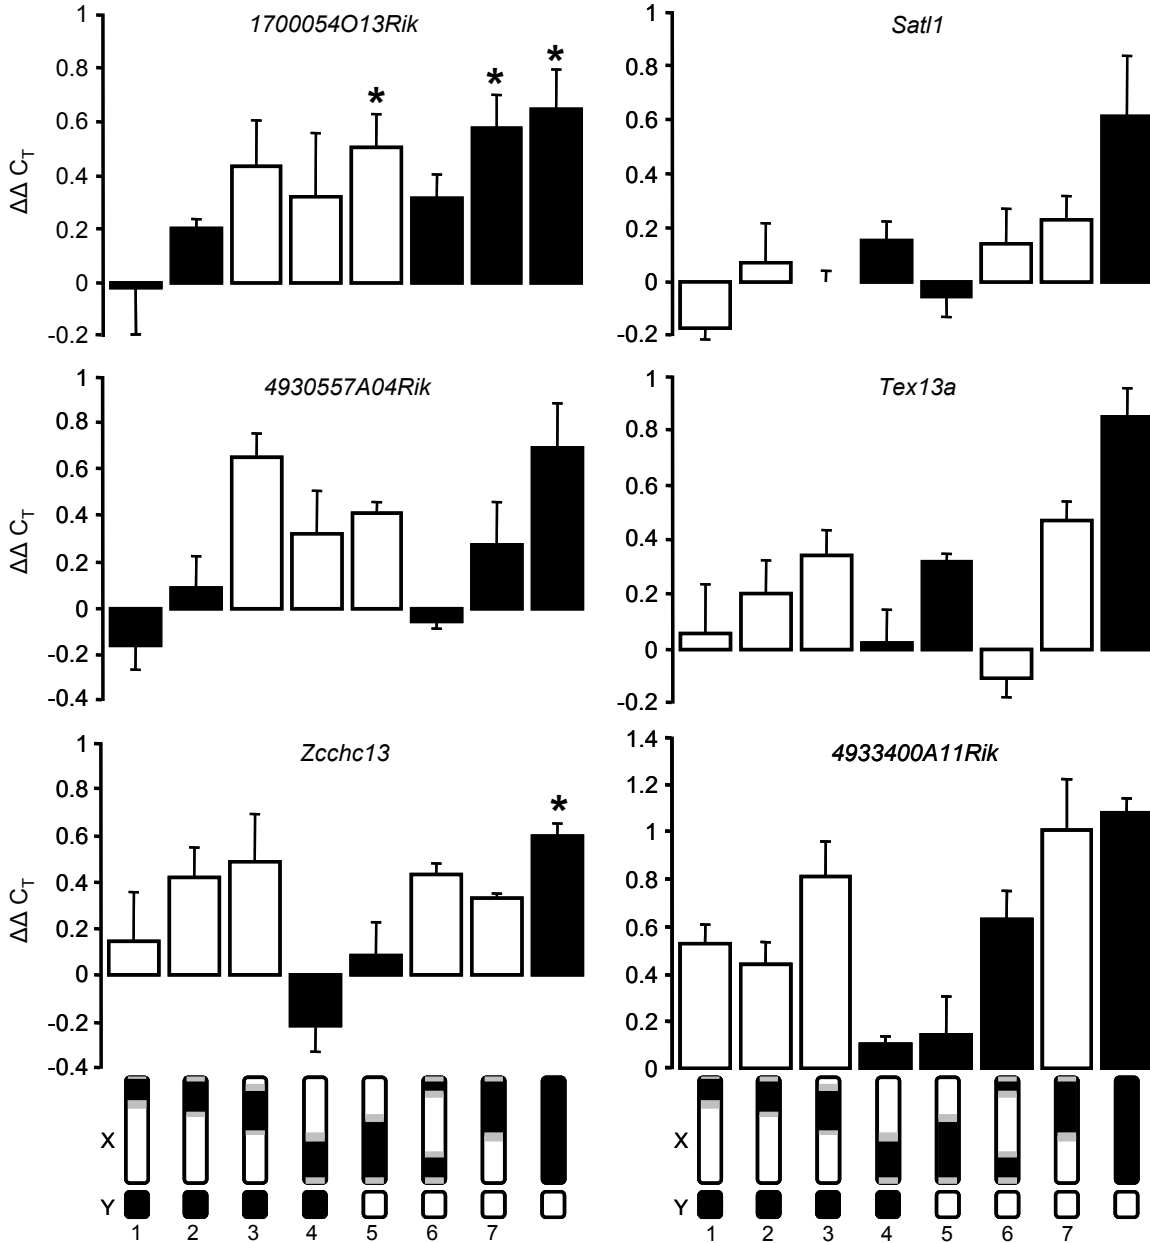

**Figure S2** Relative expression of six X-linked genes in the testes of  $F_1$  males.  $\Delta\Delta C_T$  is the normalized difference in expression between experimental genotypes (shown on the X axis) and the fertile  $F_1$ . X introgression genotypes are numbered 1-7; black bars denote the *musculus*<sup>PWK</sup> allele at a given locus, white bars denote the *domesticus*<sup>LEWES</sup> allele. Error bars are  $\pm 1$  SE. Tests for significant differences between experimental and control genotypes were performed on  $\Delta C_T$  values with ANOVA followed by Dunnett *post hoc* tests, \*  $P \leq 0.05$ .

**Table S1 Primers used in this study**

| Gene                                      | Chr. | Primer name | Primer sequence         | Amplicon size (bp) | Reference |
|-------------------------------------------|------|-------------|-------------------------|--------------------|-----------|
| <i>4930557A04Rik</i>                      | X    | A04Rik F    | KGCTGATGAGACTCCAGGAT    | 163                | <i>a</i>  |
|                                           |      | A04Rik R    | TCCACCAACAAGGGAGTCAT    |                    |           |
| <i>Efhc2</i>                              | X    | Efhc2 F     | CATCCTGGGTTGCTTTTGAT    | 136                | <i>a</i>  |
|                                           |      | Efhc2 R     | TGAATGGTGTCTCTCAAGG     |                    |           |
| <i>Actrt1</i>                             | X    | Actrt1 F    | CTCAAAAATGGTCTGCAACAGC  | 164                | <i>b</i>  |
|                                           |      | Actrt1 R    | TCTTGATAGGGTTCCCTCAAA   |                    |           |
| <i>1700013H16Rik</i>                      | X    | H16Rik F    | GCAATGGCACAGCTTAATGA    | 68                 | <i>a</i>  |
|                                           |      | H16Rik R    | TCCTCATTCCATTGCTCAAA    |                    |           |
| <i>Fmr1</i>                               | X    | Fmr1 F      | GGAAAAGCCAGACAGCGTAG    | 165                | <i>a</i>  |
|                                           |      | Fmr1 R      | CCTGTGCCATCTGCCTACT     |                    |           |
| <i>4930468A15Rik</i>                      | X    | A15Rik F    | CACTGGCAATGGCAACTCTA    | 162                | <i>a</i>  |
|                                           |      | A15Rik R    | GCCTGCGATAACTCCTGGTA    |                    |           |
| <i>Dmrtc1a</i>                            | X    | Dmrtc1a F   | GAGACGCCTGGTTGAGAGAC    | 104                | <i>a</i>  |
|                                           |      | Dmrtc1a R   | TCTTCCAGTGCGAACTCCT     |                    |           |
| <i>Zcchc13</i>                            | X    | Zcchc13 F   | GTGAACTGCAGCAAGACGAG    | 100                | <i>a</i>  |
|                                           |      | Zcchc13 R   | GGGGTTACTAAGCGGTAGCC    |                    |           |
| <i>Rps6ka6</i>                            | X    | Rps6ka6 F   | AAGAACGCAGCAACGTTAT     | 94                 | <i>a</i>  |
|                                           |      | Rps6ka6 R   | AAACTGGCTCTCCCTCTCC     |                    |           |
| <i>Sat11</i>                              | X    | Sat11 F     | AACCATTGGATTTGCCATGT    | 153                | <i>a</i>  |
|                                           |      | Sat11 R     | TCGGTGTGATGGCTATCTG     |                    |           |
| <i>1700008I05Rik</i>                      | X    | I05Rik F    | AAAGCCAATTCGTGGAGACAAAT | 192                | <i>b</i>  |
|                                           |      | I05Rik R    | TGGGAGAGATGCAGAATATCCA  |                    |           |
| <i>Tex13a</i><br>( <i>1700025D03Rik</i> ) | X    | Tex13a F    | TGTCACCAGACCTGAAGCAG    | 169                | <i>a</i>  |
|                                           |      | Tex13a R    | CTTACTGCATTCCGGGAGAGC   |                    |           |
| <i>Ammecr1</i>                            | X    | Ammecr1 F   | GCTTTTCTGCTCGGTGTCTC    | 143                | <i>a</i>  |
|                                           |      | Ammecr1 R   | CAACCTCCGGTAGGTAGGTG    |                    |           |
| <i>4933400A11Rik</i>                      | X    | A11Rik F    | AAATGGGTATCAGGCAGCAC    | 170                | <i>a</i>  |
|                                           |      | A11Rik R    | CAGTGGGCCATTAAGCATGT    |                    |           |
| <i>Acrv1</i>                              | 9    | Acrv1 F     | TGAGTACACCACTTCCAAGCA   | 60                 | <i>c</i>  |
|                                           |      | Acrv1 R     | AAGCACATGTGTGGCAATTT    |                    |           |
| <i>Protamine 1 (Prm1)</i>                 | 16   | Prot1 F     | ACAAAATTCACCTGCTCACA    | 129                | <i>d</i>  |
|                                           |      | Prot1 R     | CATCTGCTCCTGCTTTTGCT    |                    |           |

| Gene                      | Chr. | Primer name | Primer sequence           | Amplicon size (bp) | Reference |
|---------------------------|------|-------------|---------------------------|--------------------|-----------|
| <i>Hormad1</i>            | 3    | Hormad1 F   | CTGCTGACACCAAGAAAGCA      | 148                | <i>a</i>  |
|                           |      | Hormad1 R   | CCTGGTGGTTGTAATCTGG       |                    |           |
| <i>Hist1h1t (H1t)</i>     | 13   | Hist1h1t F  | GTTGGCTCTCCTTTAGTTTTCACTT | 128                | <i>a</i>  |
|                           |      | Hist1h1t R  | GCCTTTTAGATGAAGGTTTCTCCT  |                    |           |
| <i>Igf1r</i>              | 7    | Igf1r F     | CGGTGACTTCTGCTCAAATG      | 150                | <i>a</i>  |
|                           |      | Igf1r R     | AATGGCGGATCTTCACGTAG      |                    |           |
| <i>Ubc</i>                | 5    | Ubc F       | AGCCCAGTGTTACCACCAAG      | 118                | <i>a</i>  |
|                           |      | Ubc R       | CTAAGACACCTCCCCATCA       |                    |           |
| <i>beta-actin (actb1)</i> | 5    | B-actin F   | CTGTATCCCCTCCATCGTG       | 167                | <i>a</i>  |
|                           |      | B-actin R   | CTTCTCCATGTCGTCACAGT      |                    |           |

*a*, this study; *b*, Coquet *et al.* 2009; *c*, Åkerfelt *et al.* 2008; *d*, Okada *et al.* 2007

#### Supporting Literature Cited

- ÅKERFELT, M., E. HENRIKSSON, A. LAIHO, A. VIHERRAARA, K. RAUTOMA *et al.*, 2008 Promoter ChIP-chip analysis in mouse testis reveals Y chromosome occupancy by HSF2. *Proc. Natl. Acad. Sci. USA* 105: 11224-11229.
- COCQUET, J., P. J. I. ELLIS, Y. YAMAUCHI, S. K. MAHADEVIAH, N. A. AFFARA *et al.*, 2009 The multicopy gene *Sly* repressed the sex chromosomes in the male mouse germline after meiosis. *PLoS Biology* 7: e1000244.
- OKADA, Y., G. SCOTT, M. K. RAY, Y. MISHINA, and Y. ZHANG, 2007 Histone demethylase JHDM2a is critical for *Tnp1* and *Prm1* transcription and spermatogenesis. *Nature* 450: 119-123.
