# Supplementary material
Source: PubMed Central journal article supplement (PMC3584000)
Supplement: cdfba9ea65abcbdf8be6d9e6a997295b_genetics.112.148635-2.pdf [file cdfba9ea65abcbdf8be6d9e6a997295b_genetics.112.148635-2.pdf]

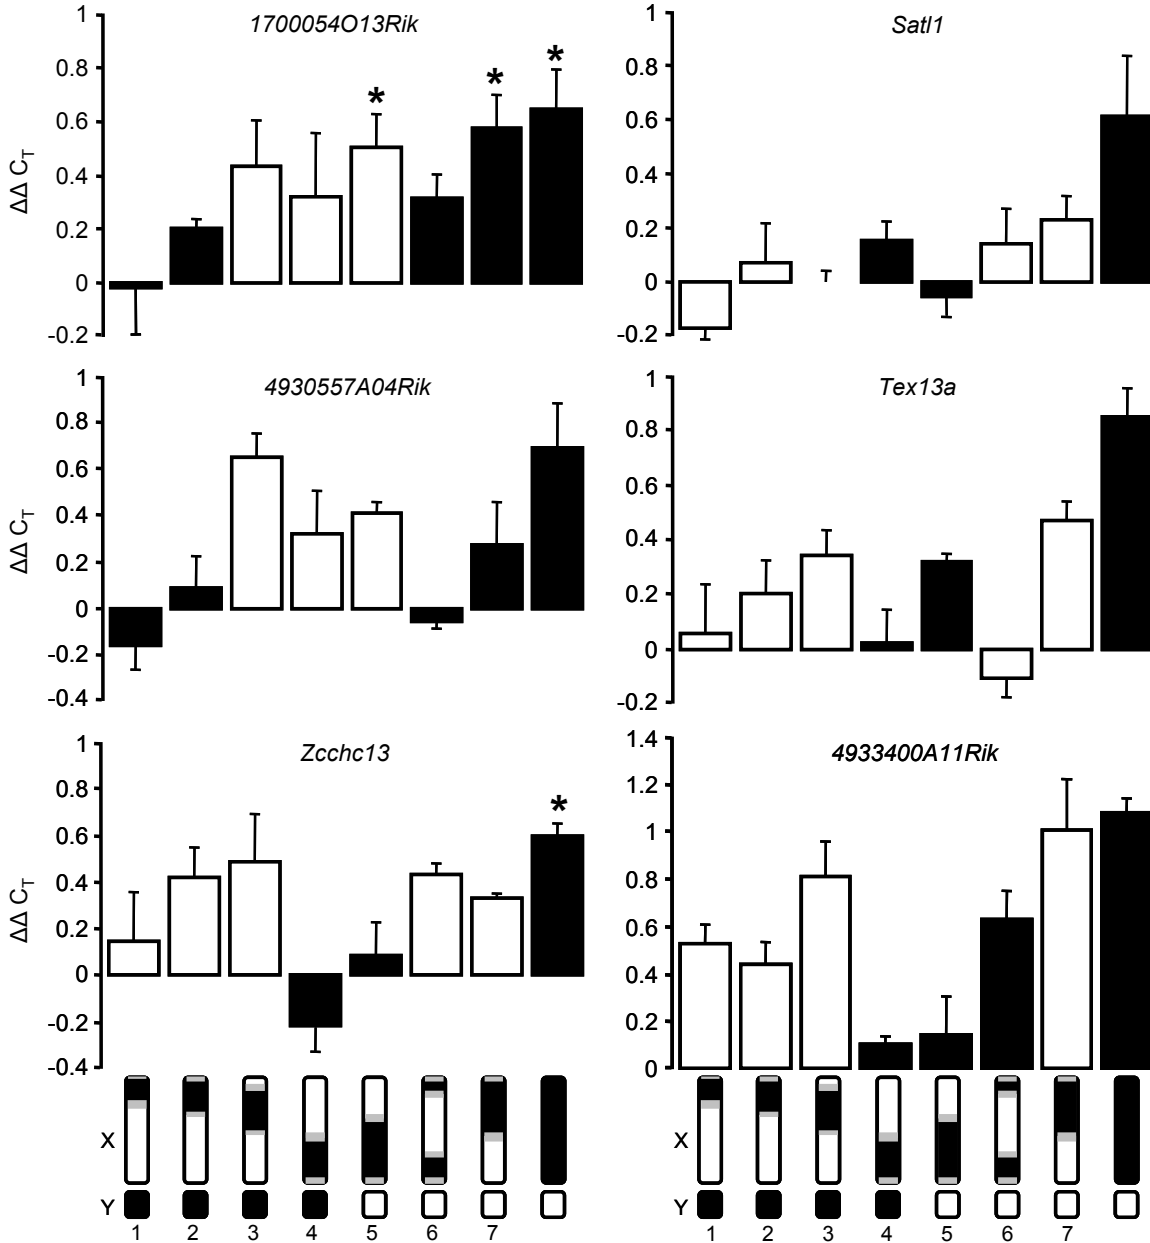

**Figure S2** Relative expression of six X-linked genes in the testes of  $F_1$  males.  $\Delta\Delta C_T$  is the normalized difference in expression between experimental genotypes (shown on the X axis) and the fertile  $F_1$ . X introgression genotypes are numbered 1-7; black bars denote the *musculus*<sup>PWK</sup> allele at a given locus, white bars denote the *domesticus*<sup>LEWES</sup> allele. Error bars are  $\pm 1$  SE. Tests for significant differences between experimental and control genotypes were performed on  $\Delta C_T$  values with ANOVA followed by Dunnett *post hoc* tests, \*  $P \leq 0.05$ .
